# Supplementary material for: Internet-Delivered Acceptance and Commitment Therapy Added to Multimodal Pain Rehabilitation: A Cluster Randomized Controlled Trial
Source: MDPI journal article supplement (doi:10.3390/jcm10245872), 2021-12-14
Supplement: s1 [file s1]

## Supplementary material Table S2

**Table S2.** Outline of content in IACT added during MMRP. Some exercises are designed for this trial, although derived from or modified from ACT-literature [1] [2-4].

| Week | Experiential exercise (text and audio track)             | Mindfulness (text and audio track)         | Weekly update/Educational text                                       | Physical exercise                 | Evaluation (BEVS) [5]                                 | Body awareness (audio tracks)               |
|------|----------------------------------------------------------|--------------------------------------------|----------------------------------------------------------------------|-----------------------------------|-------------------------------------------------------|---------------------------------------------|
| Pre  | "Man in the Hole" and "Creative hopelessness"-work sheet | Educational text. Exercise "Breathing"     | Educational text on IACT and MMRP. Measurements and Informed consent |                                   |                                                       |                                             |
| 1    | Rationale for ACT                                        | "Staying present"                          | Goal setting                                                         | Educational text and goal setting |                                                       |                                             |
| 2    | "A long journey"                                         | "Exploring"                                | Information from MMRP and lecture on pain mechanisms                 | Exercise diary                    | Educational text on BEVS and "Life values"-work sheet | "Body scan lying down"                      |
| 3    | "The shark trap"                                         | "The surroundings"                         | Encouraging goal evaluation                                          | Exercise diary                    | Committed actions and evaluation                      | "Balancing sitting" and "Meditation"        |
| 4    | "Chessboard"                                             | "Thoughts"                                 | Exercise routines. Meeting with social insurance representatives     | Exercise diary                    | Committed actions and evaluation                      | "Balancing standing" and standing exercises |
| 5    | "Passengers on the bus"                                  | Educational text. "Practicing willingness" | Summary of MMRP                                                      | Exercise diary                    | Committed actions and evaluation                      | "Behavioral based relaxation"               |
| 6    | "Fare-well party"                                        | "The scientist"                            | Aftercare. Measurements                                              | Exercise diary                    | Committed actions and evaluation                      |                                             |

Abbreviations: MMRP: Multimodal rehabilitation program; IACT: Internet-delivered acceptance and commitment therapy; BEVS: Bull's eye Values Survey.

## References

1. Buhrman M, Skoglund A, Husell J, Bergström K, Gordh T, Hursti T, et al. Guided internet-delivered acceptance and commitment therapy for chronic pain patients: A randomized controlled trial. *Behaviour Research and Therapy*. 2013;51(6):307-15.
2. Robinson P, Wicksell RK, Olsson GL. ACT with Chronic Pain Patients. In: Hayes SC, Strosahl KD, editors. *A practical guide to Acceptance and Commitment Therapy*. New York: Springer; 2004.
3. Hayes SC, Strosahl KD, Wilson KG. *Acceptance and Commitment Therapy. An experiential approach to behavior change*: Guilford Publications; 1999.

4. McCracken LM. Contextual cognitive-behavioral therapy for chronic pain. International Association for the Study of Pain, editor: Lippincott, Williams and Wilkins.; 2005.
5. Lundgren T, Luoma JB, Dahl J, Strosahl K, Melin L. The Bull's-Eye values survey: A psychometric evaluation. Cognitive and Behavioral Practice. 2012;19(4):518-26.
