# Supplementary material for: Internet-Delivered Acceptance and Commitment Therapy Added to Multimodal Pain Rehabilitation: A Cluster Randomized Controlled Trial
Source: MDPI journal article supplement (doi:10.3390/jcm10245872), 2021-12-14
Supplement: s1 [file s1]

Supplementary material Table S3

**Table S3.** Outline of content in MMR-IACT Aftercare. Some exercises are designed for this trial, although derived from or modified from ACT-literature [1] [2] [3] [4].

| Week | Educational texts    | Committed actions (BEVS) [5]            | ACT educational texts                  | Experiential exercises (text and audio track)  | Occupational therapy educational texts (flexible starting week) | Body awareness and relaxation          | Physical therapy exercises                             | Sleep educational texts                   |
|------|----------------------|-----------------------------------------|----------------------------------------|------------------------------------------------|-----------------------------------------------------------------|----------------------------------------|--------------------------------------------------------|-------------------------------------------|
| AC 1 | Rationale: Aftercare | Worksheet: Values and committed actions | Valued living                          | "The Cheshire cat", "Skiing" and "The diamond" |                                                                 |                                        | Exercise diary                                         |                                           |
| AC 2 |                      | Weekly plan and BEVS                    | Rationale: ACT                         |                                                | Rationale: OT and aftercare                                     | Educational text: Physical therapy     | Exercise diary                                         | Rationale: Sleep and aftercare            |
| AC 3 | SMART goals          | Weekly plan and BEVS                    | Hindrances. Anxiety reactions.         | "Two scales"                                   | Learning by doing                                               | Educational text: Body awareness       | Educational text on physical exercises. Exercise diary | Introduction                              |
| AC 4 | Activity planning    | Weekly plan and BEVS                    | Belly breathing and hyperventilation.  | Mindfulness: "Breathing exercise"              | Balance in and between activities                               | Basic exercises in body awareness      | Educational text on exercise diary. Exercise diary     | Sleep restriction                         |
| AC 5 | Problem-solving      | Weekly plan and BEVS                    | Dysfunctional habits and alternatives. | "Leaves on a stream"                           | Sleep                                                           | Educational text: Relaxation           | Circuit training. Music (Audio tracks). Exercise diary | Biology and function of sleep             |
| AC 6 | Communication        | Weekly plan and BEVS                    | Perspective on thoughts                | "Observer exercise"                            | Work life or studying                                           | Continuous exercises in body awareness | Exercise diary                                         | Visualization with exercise (audio track) |
| AC 7 |                      | Weekly plan and BEVS                    | Ways to practice willingness.          | "The watchdog"                                 |                                                                 | References for further training        | Exercise diary                                         | Worry                                     |
| AC 8 |                      | Weekly plan and BEVS                    | Behavioral activation.                 | "Joe the Bum"                                  |                                                                 |                                        | Exercise diary                                         | Sleep hygiene, problem                    |

|         |                                                               |                         |                            |
|---------|---------------------------------------------------------------|-------------------------|----------------------------|
|         |                                                               |                         | solving and<br>maintenance |
| AC 9    | Summary of<br>change                                          | Weekly plan<br>and BEVS | Exercise diary             |
| AC 10   | Summary of<br>steps taken and<br>evaluation                   |                         |                            |
| Post AC | Plan for contin-<br>uous aftercare.<br>Post measure-<br>ments |                         |                            |

Abbreviations: MMRP: multimodal rehabilitation program; IACT: Internet-delivered acceptance and commitment therapy; AC: Aftercare; BEVS: Bull's eye Values Survey.

## References

1. Buhrman M, Skoglund A, Husell J, Bergström K, Gordh T, Hursti T, et al. Guided internet-delivered acceptance and commitment therapy for chronic pain patients: A randomized controlled trial. *Behaviour Research and Therapy*. 2013;51(6):307-15.
2. Robinson P, Wicksell RK, Olsson GL. ACT with Chronic Pain Patients. In: Hayes SC, Strosahl KD, editors. *A practical guide to Acceptance and Commitment Therapy*. New York: Springer; 2004.
3. Hayes SC, Strosahl KD, Wilson KG. *Acceptance and Commitment Therapy. An experiential approach to behavior change*: Guilford Publications; 1999.
4. McCracken LM. *Contextual cognitive-behavioral therapy for chronic pain*. International Association for the Study of Pain, editor: Lippincott, Williams and Wilkins.; 2005.
5. Lundgren T, Luoma JB, Dahl J, Strosahl K, Melin L. The Bull's-Eye values survey: A psychometric evaluation. *Cognitive and Behavioral Practice*. 2012;19(4):518-26.
