# Supplementary material for: Internet-Delivered Acceptance and Commitment Therapy Added to Multimodal Pain Rehabilitation: A Cluster Randomized Controlled Trial
Source: MDPI journal article supplement (doi:10.3390/jcm10245872), 2021-12-14
Supplement: s1 [file s1]

# Supplementary Material Table S1

**Table S1.** Outline of content in MMRP [1]. Interventions in the ACT-sessions are derived from or modified from ACT-literature [2] [3-5].

| Week | Educational interventions                                                                                           | ACT                                                                                                                                                                                                                                                                           | OT                                                                                                                                                                 | PT                                                                                                       | Insomnia intervention                                                                                                                                                                    | Homework                                                                                                                                                                                                 |
|------|---------------------------------------------------------------------------------------------------------------------|-------------------------------------------------------------------------------------------------------------------------------------------------------------------------------------------------------------------------------------------------------------------------------|--------------------------------------------------------------------------------------------------------------------------------------------------------------------|----------------------------------------------------------------------------------------------------------|------------------------------------------------------------------------------------------------------------------------------------------------------------------------------------------|----------------------------------------------------------------------------------------------------------------------------------------------------------------------------------------------------------|
| Pre  | Rationale. Expectations for MMRP. Motivational exercise. Goal-setting.                                              |                                                                                                                                                                                                                                                                               |                                                                                                                                                                    |                                                                                                          |                                                                                                                                                                                          | Ongoing LP. Sleep registration. Goal-setting.                                                                                                                                                            |
| 1    | Goal-setting. Values intervention. Behavior change. Biology, functions and mechanisms of chronic pain. Mindfulness. | Rationale. Group dynamics intervention. Values interventions: Alice and the Cheshire cat; The Diamond; Differences between goal/values/result. Mindfulness exercises (notice 3 things).<br>Introducing creative hopelessness; Man in a hole. Serenity prayer (short version). | Inventory and discussion of activity patterns and – execution and meaningful activities (COPM) and Return to work.                                                 | LA: Experiences of physical training.<br>BBA: Stabilizing exercises. Present moment.<br>CT: Stabilizing. | Group dynamics intervention. Goals and expectation. Rationale for sleep restriction. Biology and function of sleep and the effect of sleep medication. Evaluation of sleep registration. | Goals and expectations. Life-compass. Activity diary with reflections. Evaluating LP. BBA-exercise. Sleep registration and educational text.                                                             |
| 2    | Behavior regulation and common psychological reactions to pain.                                                     | Values: A long journey. Creative hopelessness. Mindfulness: Leaves on a stream. Defusion interventions: Feed the tiger, Tug-of-War with a monster. BEVS [6].                                                                                                                  | Analysis of activity pattern, problem solving and inventory of possible alternative strategies. Skills training in activity (EMG-biofeedback). Introducing pacing, | BBA: Stabilizing exercises. Present moment.<br>CT: Motor control                                         | Sleep restriction, stimulus control. Behavior change techniques. Evaluating sleep diary.                                                                                                 | Observing inner sensations. Hindrances in Life compass. Behavioral experiment alternative strategy in meaningful activity (OT). Exercise diary of LP. BBA exercise. Sleep diary. Apply stimulus control. |

|   |                         |                                                                                                                                                                                                         |                                                                                                                                                                                                        |                                                                                                      |                                                                                  |                                                                                                                                                                                                             |
|---|-------------------------|---------------------------------------------------------------------------------------------------------------------------------------------------------------------------------------------------------|--------------------------------------------------------------------------------------------------------------------------------------------------------------------------------------------------------|------------------------------------------------------------------------------------------------------|----------------------------------------------------------------------------------|-------------------------------------------------------------------------------------------------------------------------------------------------------------------------------------------------------------|
|   |                         |                                                                                                                                                                                                         | graded activity and present moment in activity.                                                                                                                                                        |                                                                                                      |                                                                                  |                                                                                                                                                                                                             |
| 3 | Anxiety psychoeducation | Values and mindfulness interventions (breathing). Introducing acceptance (Take your keys with you) and committed actions. The shark trap.                                                               | Skills training in everyday life. Focus on meaningfulness in work/studies. Behavioral activation intervention. Occupational role and significance. WRI assessment                                      | LA: Joy of movement<br>BBA: Stabilizing exercises with present moment.<br>CT: Graded exercise.       | Educational intervention: Biology and function of sleep. Evaluating sleep diary. | CA worksheet; BEVS. Reflect on significance of work. Exercise diary of LP. BBA exercise. Sleep diary. Learning by doing- exercise.                                                                          |
| 4 |                         | Hindrances. Introducing perspective/self as context (Content on cards, Observer exercise). Acceptance as an alternative to control (Passengers on the bus). Mindfulness (Breathing). Committed actions. | Analysis of activity pattern, problem solving and inventory of possible alternative strategies. Homework evaluation. Assessment of work situation; strengths and weaknesses. My skills and competence. | BW: physical activity pyramid<br>BBA: Centering, breathing, present moment<br>CT: pacing in exercise | Visualizing based relaxation exercises. Evaluating sleep diary.                  | CA worksheet. Plan for changes in work life and home setting to reach a sustainable work situation. Ongoing behavioral activation. Exercise diary of LP. BBA exercise. Sleep diary. Practice visualization. |
| 5 |                         | Acceptance (Bubble in the road, Jump Exercise, Tin Can Monster, Joe the Bum). Mindfulness skills. CA,                                                                                                   | Skills training in everyday life (EMG, video                                                                                                                                                           | BW: Goals and valued direction.                                                                      | Strategies for worry. Soldiers in the parade. Evaluating sleep diary             | Committed actions. Exercise diary of LP. BBA exercise. Sleep diary. Test                                                                                                                                    |

|   |                                                                                                                                                                              |                                                                                                                                                                        |                                                                                                                          |                                                                                             |
|---|------------------------------------------------------------------------------------------------------------------------------------------------------------------------------|------------------------------------------------------------------------------------------------------------------------------------------------------------------------|--------------------------------------------------------------------------------------------------------------------------|---------------------------------------------------------------------------------------------|
|   | long-term change (chessboard, serenity prayer)                                                                                                                               | feedback).<br>Problem solving and planning for return to work.<br>Continued behavioral activation. WRI feedback.<br>Plan meeting with social insurance representative  | BBA: Centering, breathing, present moment<br>CT: Autopilot, workability                                                  | techniques to handle worry and rumination. Prepare for aftercare plan.                      |
| 6 | Summary and evaluation.<br>Aftercare plan. Letter to myself. Rational for long-lasting behavioral change, ongoing mindfulness training and continuous behavioral activation. | Skills training follow-up.<br>Behavioral activation follow-up. Feedback on skills training (video). Present moment exercise: want/must. Summarizing. COPM measurement. | BW: Maintenance, strategies for hindrances.<br>BBA: Centering, Breathing, present moment<br>CT: Maintenance. Tippa test. | Evaluating exercise diary LP. Maintenance plan for physical exercise and BBA. CT exercises. |

Abbreviations: MMRP: multimodal rehabilitation program; ACT: Acceptance and commitment therapy; OT: occupational therapy; PT: physical therapy; LP: Low-intensive physical activity; COPM: Canadian occupational performance measure; LA: Light aerobics; BBA: Basic Body awareness; CT: Circuit training; BEVS: Bull's eye Values Survey; EMG: Electromyogram; WRI; CA: Committed action; Worker Role Inventory; BW: beginner workout.

## References

1. Gerdle B, Molander P, Stenberg G, Stålnacke BM, Enthoven P. Weak outcome predictors of multimodal rehabilitation at one-year follow-up in patients with chronic pain - a practice based evidence study from two SQRP centres. BMC Musculoskeletal Disorders. 2016;17(1):1-14.

2. Buhrman M, Skoglund A, Husell J, Bergström K, Gordh T, Hursti T, et al. Guided internet-delivered acceptance and commitment therapy for chronic pain patients: A randomized controlled trial. *Behaviour Research and Therapy*. 2013;51(6):307-15.
3. Robinson P, Wicksell RK, Olsson GL. ACT with Chronic Pain Patients. In: Hayes SC, Strosahl KD, editors. *A practical guide to Acceptance and Commitment Therapy*. New York: Springer; 2004.
4. Hayes SC, Strosahl KD, Wilson KG. *Acceptance and Commitment Therapy. An experiential approach to behavior change*: Guilford Publications; 1999.
5. McCracken LM. Contextual cognitive-behavioral therapy for chronic pain. International Association for the Study of Pain, editor: Lippincott, Williams and Wilkins.; 2005.
6. Lundgren T, Luoma JB, Dahl J, Strosahl K, Melin L. The Bull's-Eye values survey: A psychometric evaluation. *Cognitive and Behavioral Practice*. 2012;19(4):518-26.
